# Supplementary material for: Thermoreversible high-temperature gelation of an ionic liquid with poly(benzyl methacrylate-b-methyl methacrylate-b-benzyl methacrylate) triblock copolymer
Source: Royal Society of Chemistry journal article supplement (doi:10.1039/c2sm25375e), 2012-01-01
Supplement: c2sm25375e.pdf [file c2sm25375e.pdf]

## Electronic Supplementary Information

### **Thermoreversible high-temperature gelation of an ionic liquid with poly(benzyl methacrylate-*b*-methyl methacrylate -*b*-benzyl methacrylate) triblock copolymer**

Yuzo Kitazawa,<sup>‡a</sup> Takeshi Ueki,<sup>‡a,d</sup> Kazuyuki Niitsuma,<sup>a</sup> Satoru Imaizumi,<sup>a</sup> Timothy P. Lodge,<sup>b,c</sup> and Masayoshi Watanabe\*<sup>a</sup>

<sup>a</sup>*Department of Chemistry & Biotechnology, Yokohama National University, 79-5 Tokiwadai, Hodogaya-ku, Yokohama 240-8501, Japan*

<sup>b</sup>*Department of Chemistry, University of Minnesota Minneapolis, Minnesota, 55455, USA*

<sup>c</sup>*Department of Chemical Engineering & Materials Science, University of Minnesota Minneapolis, Minnesota, 55455, USA*

<sup>d</sup>*Present Address: Department of Materials Engineering Graduate School of Engineering, The University of Tokyo, 7-3-1 Hongo, Bunkyo-ku, Tokyo 113-8656 Japan*

*E-mail: [mwatanab@ynu.ac.jp](mailto:mwatanab@ynu.ac.jp); Tel & Fax: +81-45-339-3955*

<sup>‡</sup> Y. K. and T. U. equally contributed to this work.

Corresponding author: M. W. (E-mail: [mwatanab@ynu.ac.jp](mailto:mwatanab@ynu.ac.jp))

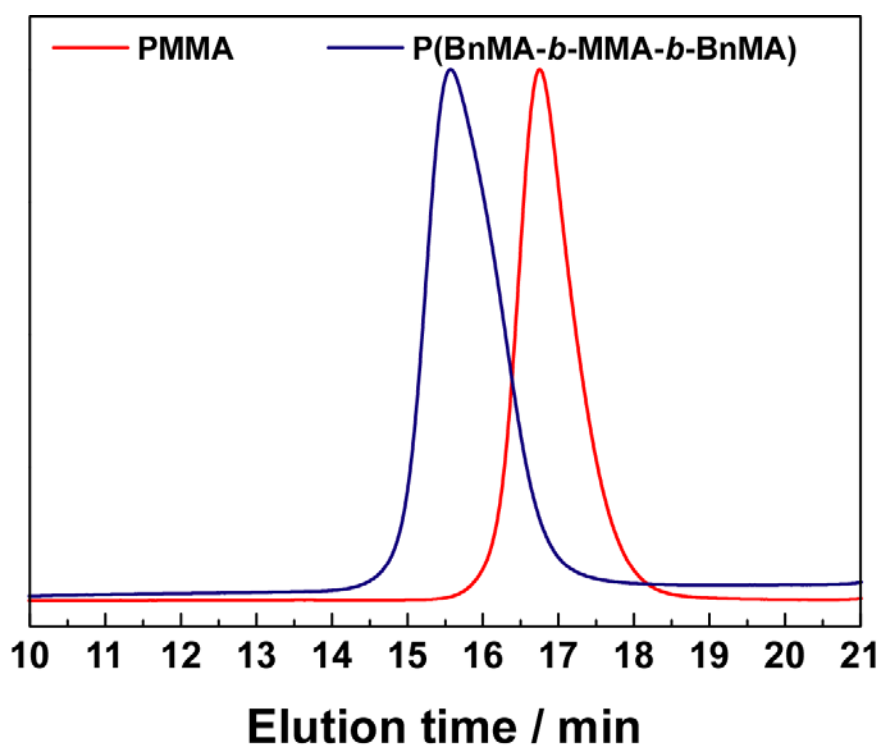

**Figure S1.** Size exclusion chromatography traces of PMMA macroinitiator and P(BnMA-*b*-MMA-*b*-BnMA) triblock copolymer (BMB).

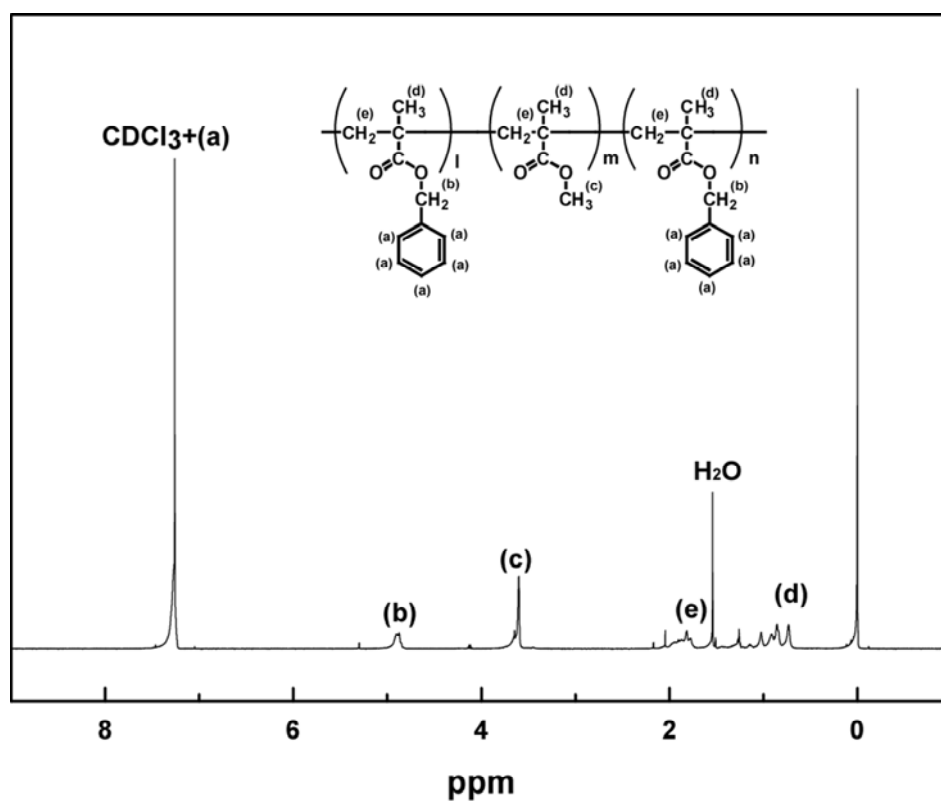

**Figure S2.**  $^1\text{H}$  NMR spectrum of BMB.
